# Supplementary material
Source: MDPI journal article supplement (https://www.mdpi.com/2073-4441/13/8/1126)
Supplement: s1 [file s1]

Supplementary Material

# Meeting the Salinity Requirements of the Bivalve Mollusc *Crassostrea gigas* in the Depuration Process and Posterior Shelf-Life Period to Improve Food Safety and Product Quality

João A. Silvestre <sup>1</sup>, Sílvia F. S. Pires <sup>2</sup>, Vitória Pereira <sup>2</sup>, Miguel Colaço <sup>1</sup>, Ana P. L. Costa <sup>2</sup>, Amadeu M. V. M. Soares <sup>2</sup>, Domitília Matias <sup>3</sup>, Filipa Bettencourt <sup>3</sup>, Sergio Fernández-Boo <sup>4</sup>, Rui J. M. Rocha <sup>2,\*</sup> and Andreia C. M. Rodrigues <sup>2</sup>

<sup>1</sup> Department of Biology, University of Aveiro, 3810-193 Aveiro, Portugal; joaosilvestre@ua.pt (J.A.S.); mbfc@ua.pt (M.C.)

<sup>2</sup> CESAM (Centre for Marine and Environmental Studies), Department of Biology, University of Aveiro, 3810-193 Aveiro, Portugal; silviapires1@ua.pt (S.F.S.P.); vitoria.pereira@ua.pt (V.P.); anaplcosta@ua.pt (A.P.L.C.); asoares@ua.pt (A.M.V.M.S.); rodrigues.a@ua.pt (A.C.M.R.)

<sup>3</sup> IPMA, Instituto Português do Mar e da Atmosfera, Olhão, Portugal; dmatias@ipma.pt (D.M.); fbettencourt@ipma.pt (F.B.)

<sup>4</sup> Centro Interdisciplinar de Investigação Marinha e Ambiental (CIIMAR), Universidade do Porto, Avenida General Norton de Matos, S/N, 4450-208 Matosinhos, Portugal; sboo@ciimar.up.pt

\* Correspondence: ruimirandarocha@ua.pt

## Supplementary Material

**Table S1.** Parametric *t*-test or non-parametric Mann-Whitney (U) values for the measured biochemical biomarkers of *C. gigas* of the t(0) and each salinity of the t(24h).

|                 | Analysis    | <i>t</i> | <i>df</i> | U  | P      |
|-----------------|-------------|----------|-----------|----|--------|
| <b>Lipids</b>   | t(0) vs. 25 | 0.967    | 8         | —  | 0.362  |
|                 | t(0) vs. 30 | 0.103    | 8         | —  | 0.920  |
|                 | t(0) vs. 35 | 0.920    | 8         | —  | 0.384  |
|                 | t(0) vs. 40 | 0.987    | 8         | —  | 0.352  |
| <b>Sugars</b>   | t(0) vs. 25 | 1.52     | 8         | —  | 0.167  |
|                 | t(0) vs. 30 | 0.131    | 8         | —  | 0.899  |
|                 | t(0) vs. 35 | 2.035    | 8         | —  | 0.076  |
|                 | t(0) vs. 40 | 3.113    | 8         | —  | 0.014  |
| <b>Proteins</b> | t(0) vs. 25 | —        | —         | 12 | >0.999 |
|                 | t(0) vs. 30 | —        | —         | 9  | 0.548  |
|                 | t(0) vs. 35 | —        | —         | 5  | 0.151  |
|                 | t(0) vs. 40 | —        | —         | 11 | 0.841  |
| <b>Ea</b>       | t(0) vs. 25 | 1.184    | 8         | —  | 0.27   |
|                 | t(0) vs. 30 | 0.401    | 8         | —  | 0.699  |
|                 | t(0) vs. 35 | 1.865    | 8         | —  | 0.099  |
|                 | t(0) vs. 40 | 2.285    | 8         | —  | 0.052  |
| <b>Ec</b>       | t(0) vs. 25 | —        | —         | 3  | 0.056  |
|                 | t(0) vs. 30 | —        | —         | 4  | 0.095  |
|                 | t(0) vs. 35 | —        | —         | 4  | 0.095  |
|                 | t(0) vs. 40 | —        | —         | 11 | 0.841  |
| <b>CEA</b>      | t(0) vs. 25 | 2.519    | 8         | —  | 0.036  |
|                 | t(0) vs. 30 | 3.169    | 8         | —  | 0.013  |
|                 | t(0) vs. 35 | 3.449    | 8         | —  | 0.009  |
|                 | t(0) vs. 40 | 2.463    | 8         | —  | 0.039  |
| <b>CAT</b>      | t(0) vs. 25 | 0.659    | 8         | —  | 0.528  |

|      |             |         |   |    |       |
|------|-------------|---------|---|----|-------|
| tGSH | t(0) vs. 30 | 0.6698  | 8 | —  | 0.522 |
|      | t(0) vs. 35 | 2.182   | 8 | —  | 0.061 |
|      | t(0) vs. 40 | 3.525   | 8 | —  | 0.008 |
|      | t(0) vs. 25 | —       | — | 8  | 0.421 |
|      | t(0) vs. 30 | —       | — | 5  | 0.151 |
|      | t(0) vs. 35 | —       | — | 2  | 0.032 |
|      | t(0) vs. 40 | —       | — | 3  | 0.056 |
| GST  | t(0) vs. 25 | —       | — | 10 | 0.69  |
|      | t(0) vs. 30 | —       | — | 5  | 0.151 |
|      | t(0) vs. 35 | —       | — | 3  | 0.056 |
|      | t(0) vs. 40 | —       | — | 3  | 0.056 |
| LPO  | t(0) vs. 25 | 3.544   | 8 | —  | 0.008 |
|      | t(0) vs. 30 | 1.619   | 8 | —  | 0.144 |
|      | t(0) vs. 35 | 0.06341 | 8 | —  | 0.951 |
|      | t(0) vs. 40 | 0.9845  | 8 | —  | 0.354 |

**Table S2.** Two-way ANOVA parameters showing total variation (%), F and P values for the biochemical biomarkers measured in *C. gigas* after 24-hour depuration and 6days of shelf-life, with time and salinity as factors.

|          | Source of variation | % of total variation | F (DFn, DFd)      | P     |
|----------|---------------------|----------------------|-------------------|-------|
| Lipids   | Interaction         | 4.324                | F (3, 32) = 0.518 | 0.673 |
|          | Time                | 0.005                | F (1, 32) = 0.002 | 0.966 |
|          | Salinity            | 6.562                | F (3, 32) = 0.786 | 0.511 |
| Sugars   | Interaction         | 19.13                | F (3, 32) = 2.671 | 0.064 |
|          | Time                | 0.12                 | F (1, 32) = 0.050 | 0.824 |
|          | Salinity            | 4.383                | F (3, 32) = 0.612 | 0.612 |
| Proteins | Interaction         | 15.33                | F (3, 32) = 2.216 | 0.105 |
|          | Time                | 3.303                | F (1, 32) = 1.432 | 0.240 |
|          | Salinity            | 7.556                | F (3, 32) = 1.092 | 0.367 |
| Ea       | Interaction         | 7.315                | F (3, 32) = 0.888 | 0.458 |
|          | Time                | 0.127                | F (1, 32) = 0.046 | 0.831 |
|          | Salinity            | 4.638                | F (3, 32) = 0.563 | 0.644 |
| Ec       | Interaction         | 20.69                | F (3, 32) = 2.857 | 0.052 |
|          | Time                | 0.578                | F (1, 32) = 0.240 | 0.628 |
|          | Salinity            | 1.497                | F (3, 32) = 0.207 | 0.891 |
| CEA      | Interaction         | 16.87                | F (3, 32) = 2.414 | 0.085 |
|          | Time                | 1.668                | F (1, 32) = 0.716 | 0.404 |
|          | Salinity            | 6.921                | F (3, 32) = 0.990 | 0.410 |
| CAT      | Interaction         | 32.78                | F (3, 32) = 5.300 | 0.004 |
|          | Time                | 0.033                | F (1, 32) = 0.016 | 0.901 |
|          | Salinity            | 1.203                | F (3, 32) = 0.195 | 0.899 |
| tGSH     | Interaction         | 9.419                | F (3, 32) = 1.570 | 0.216 |
|          | Time                | 24.27                | F (1, 32) = 12.14 | 0.001 |
|          | Salinity            | 2.32                 | F (3, 32) = 0.387 | 0.763 |
| GST      | Interaction         | 24.48                | F (3, 32) = 3.980 | 0.016 |
|          | Time                | 1.192                | F (1, 32) = 0.581 | 0.451 |
|          | Salinity            | 8.705                | F (3, 32) = 1.415 | 0.256 |
| LPO      | Interaction         | 29.27                | F (3, 32) = 7.831 | <.001 |
|          | Time                | 2.933                | F (1, 32) = 2.354 | 0.135 |
|          | Salinity            | 27.93                | F (3, 32) = 7.471 | <.001 |
